# Supplementary material
Source: PubMed Central journal article supplement (PMC10435278)

Autosomal All

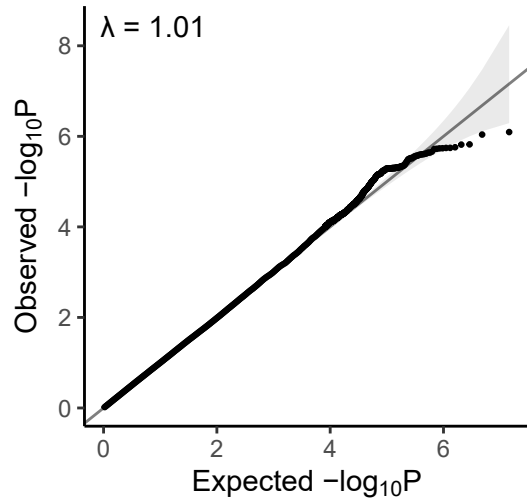

Autosomal Gain

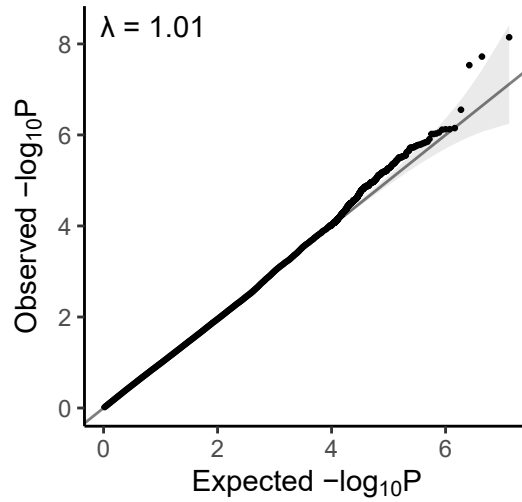

Autosomal Loss

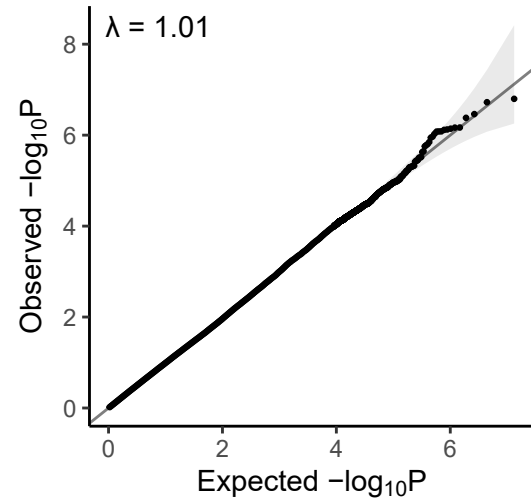

Autosomal CN-LOH

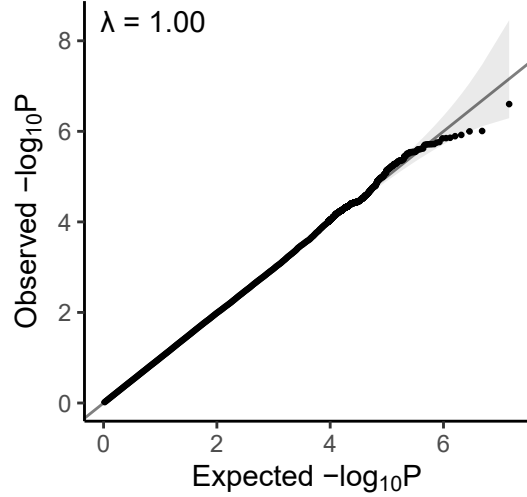

ChrX All

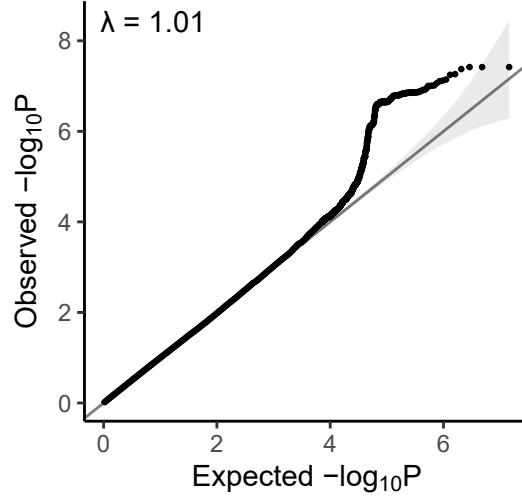

ChrX Gain

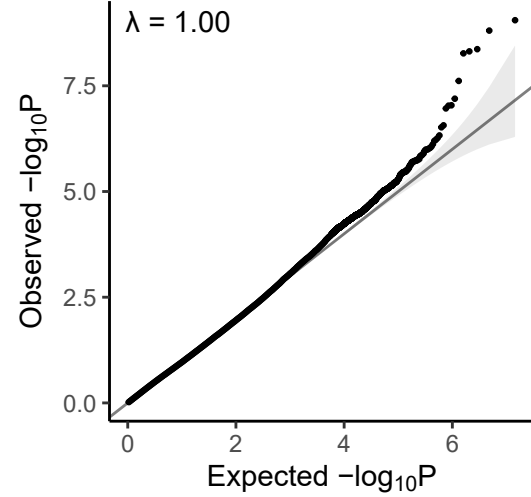

ChrX Loss

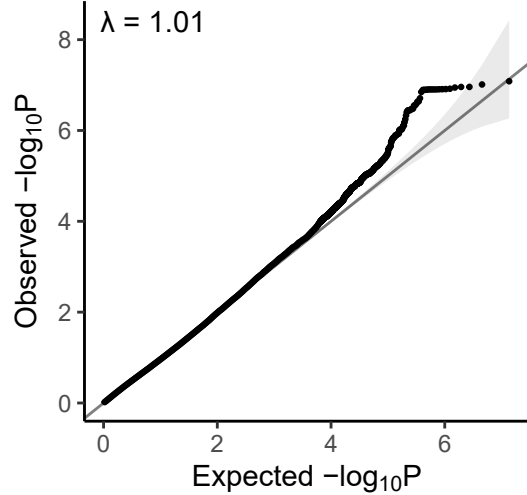

ChrX CN-LOH

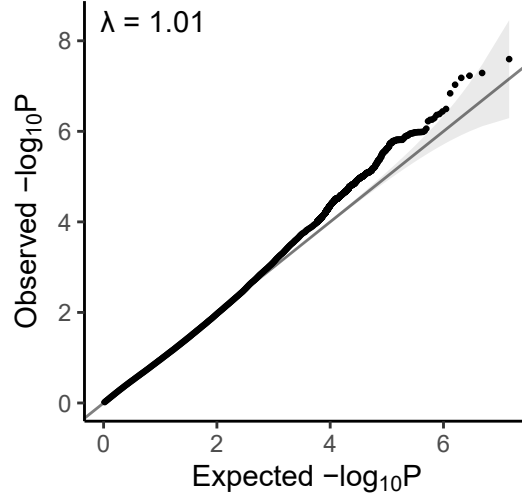

mChrY-loss

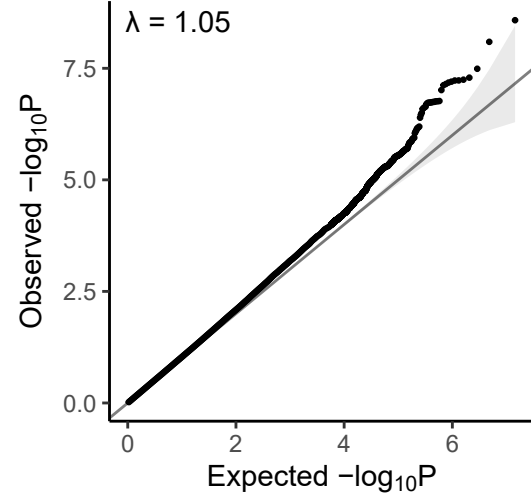

Supplement: NIHMS1922894-supplement-Suppl__Figure_S2.pdf [file NIHMS1922894-supplement-Suppl__Figure_S2.pdf]
