# Supplementary material
Source: PubMed Central journal article supplement (PMC10435278)

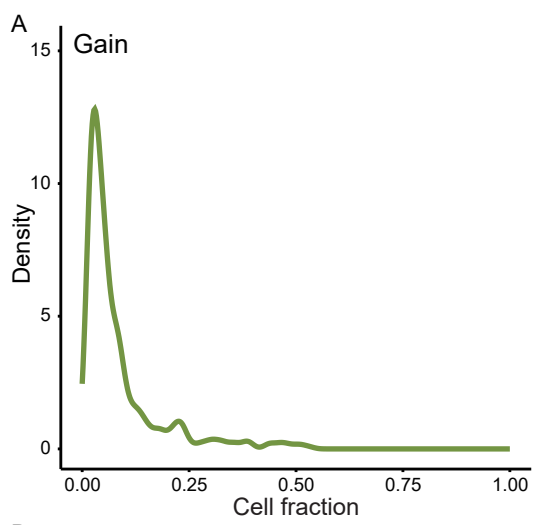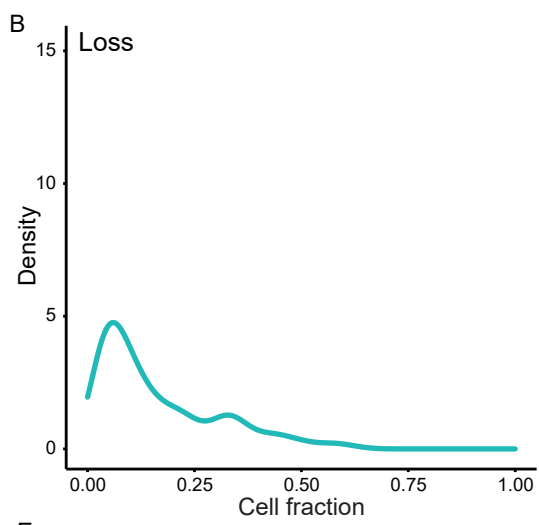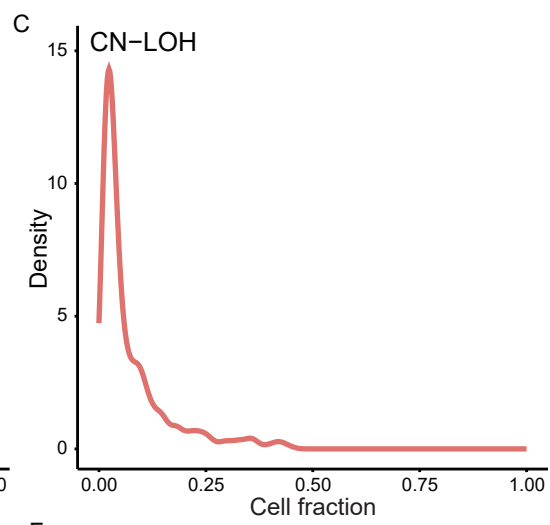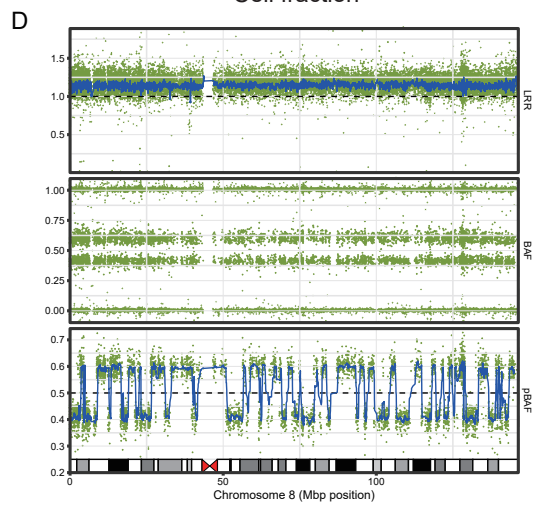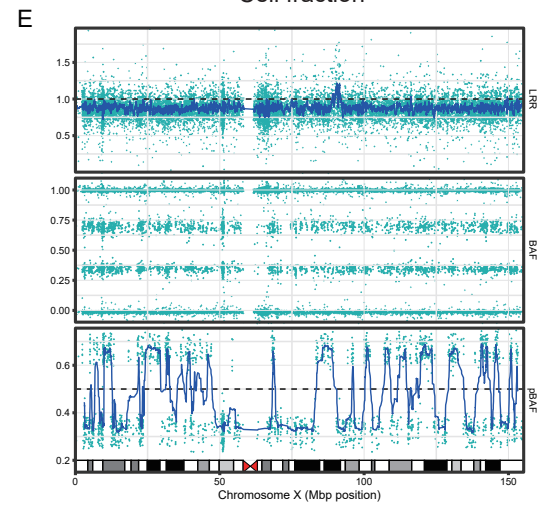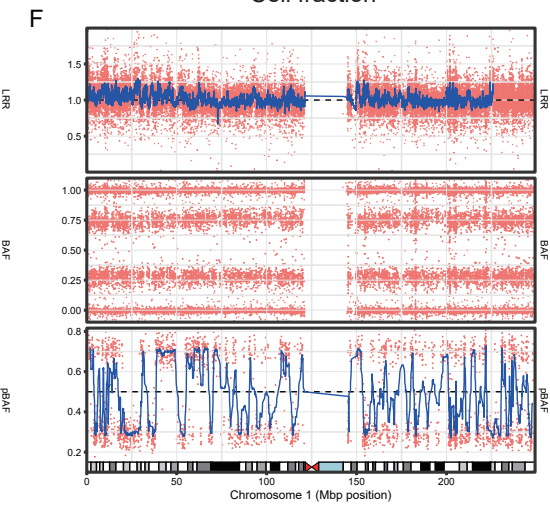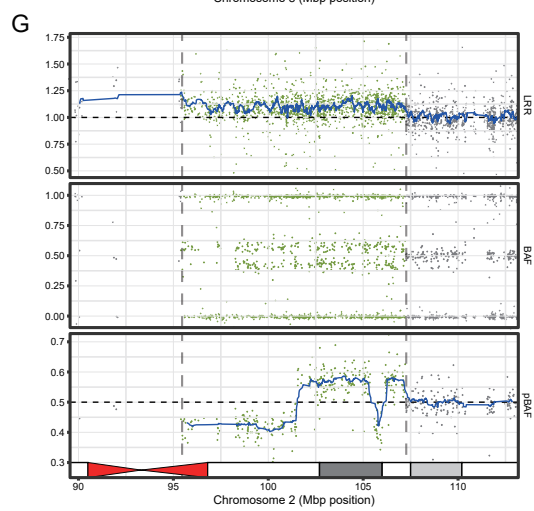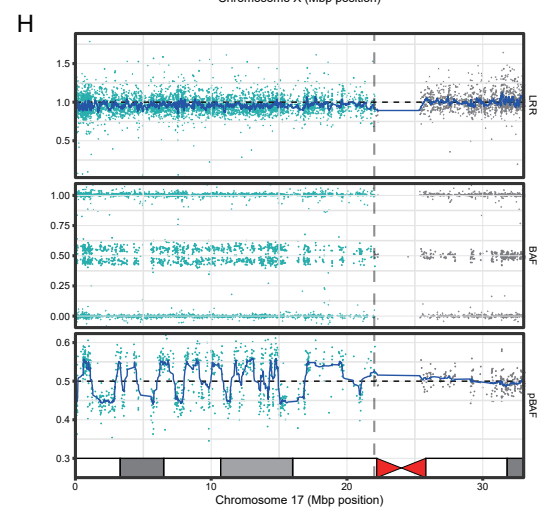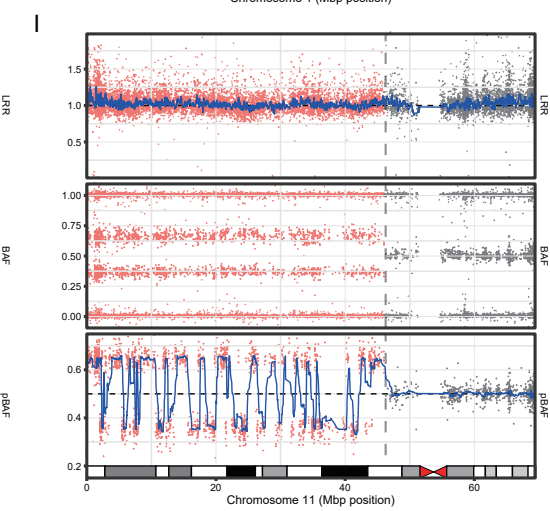

Supplement: NIHMS1922894-supplement-Suppl__Figure_S1.pdf [file NIHMS1922894-supplement-Suppl__Figure_S1.pdf]

**A**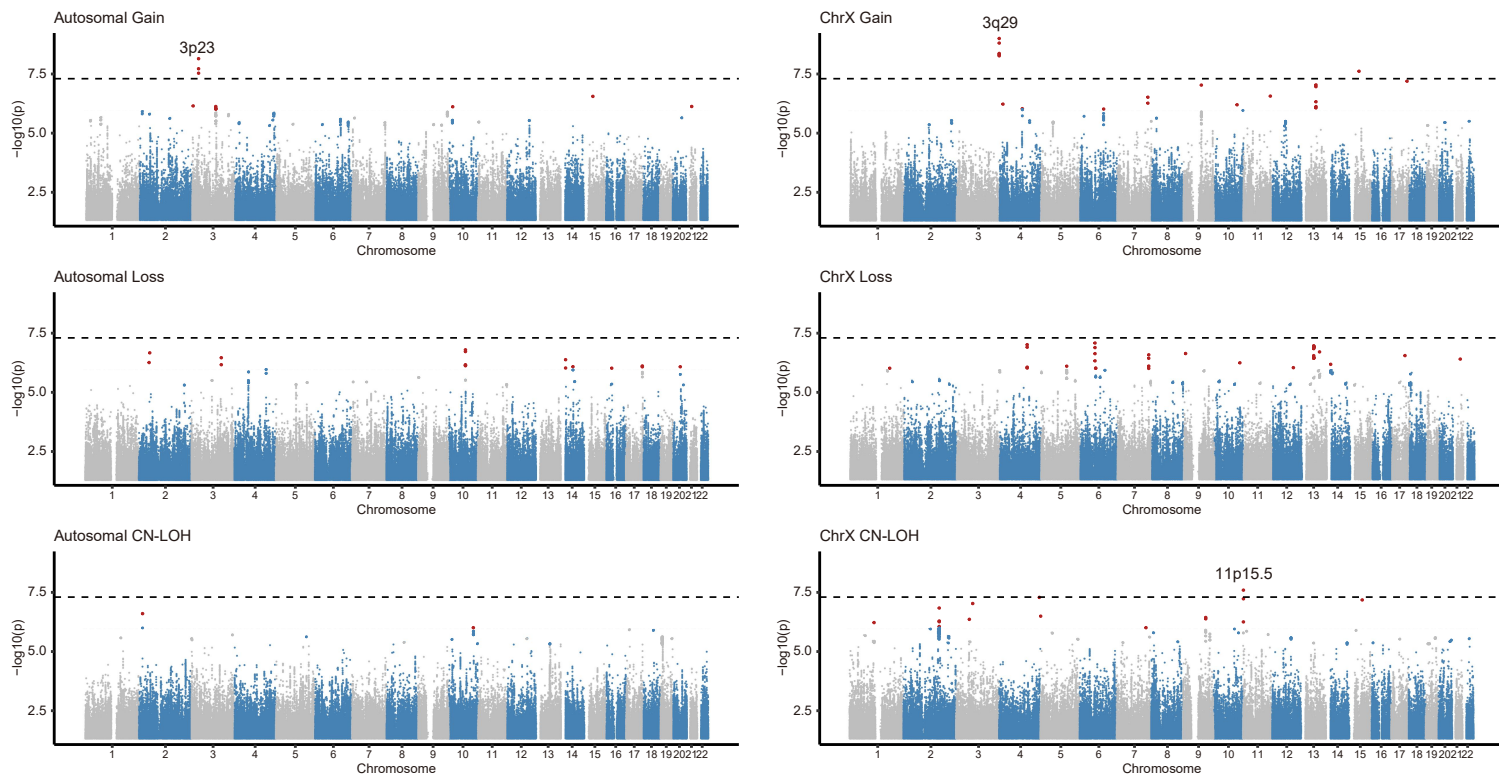**B**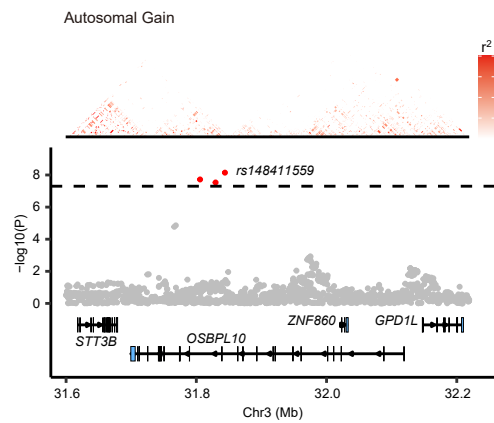**C**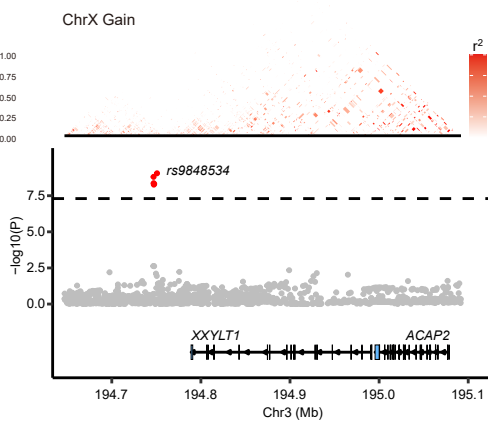**D**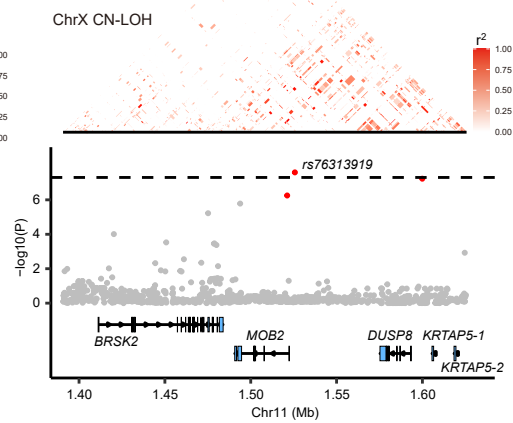

Supplement: NIHMS1922894-supplement-Suppl__Figure_S3.pdf [file NIHMS1922894-supplement-Suppl__Figure_S3.pdf]
